# Supplementary material
Source: publisher site journal article supplement (https://www.dovepress.com/article/supplementary_file/597338/597338_Supplementary%20Material_1_1.docx)
Supplement: Supplementary file 1 [file 597338_Supplementary%20Material_1_1.docx]

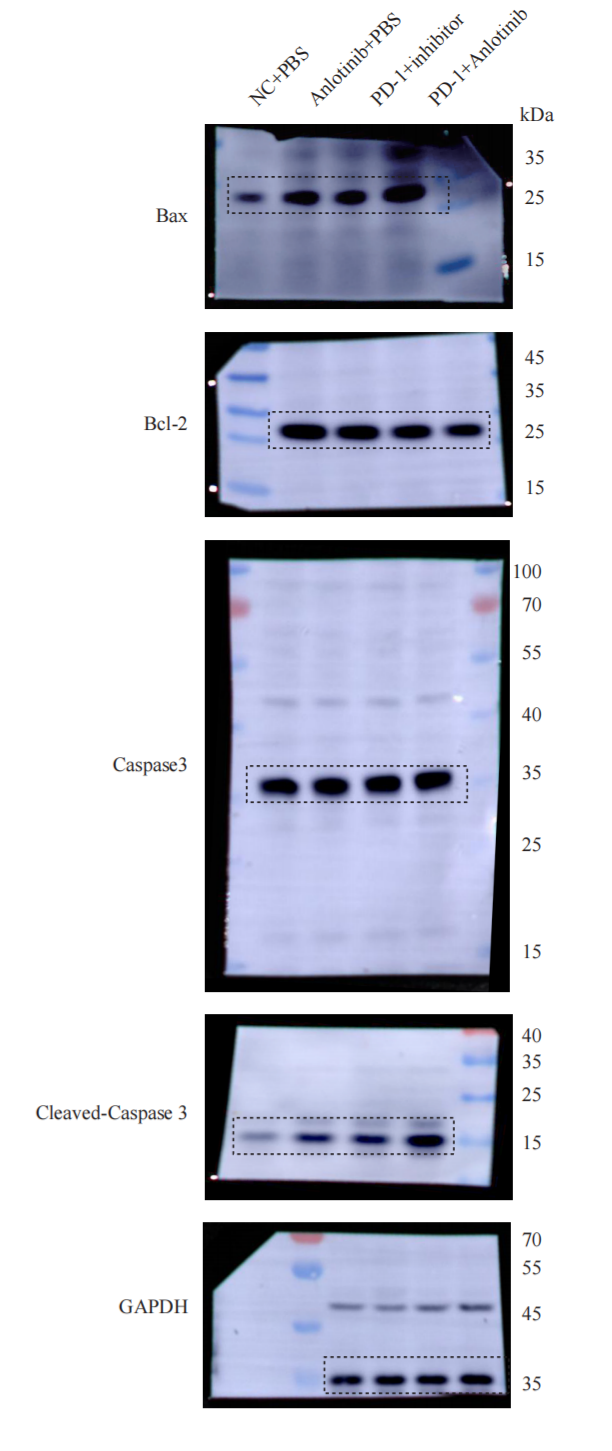


Fig. S1. The uncropped images of original western blots in Fig. 1.

­­
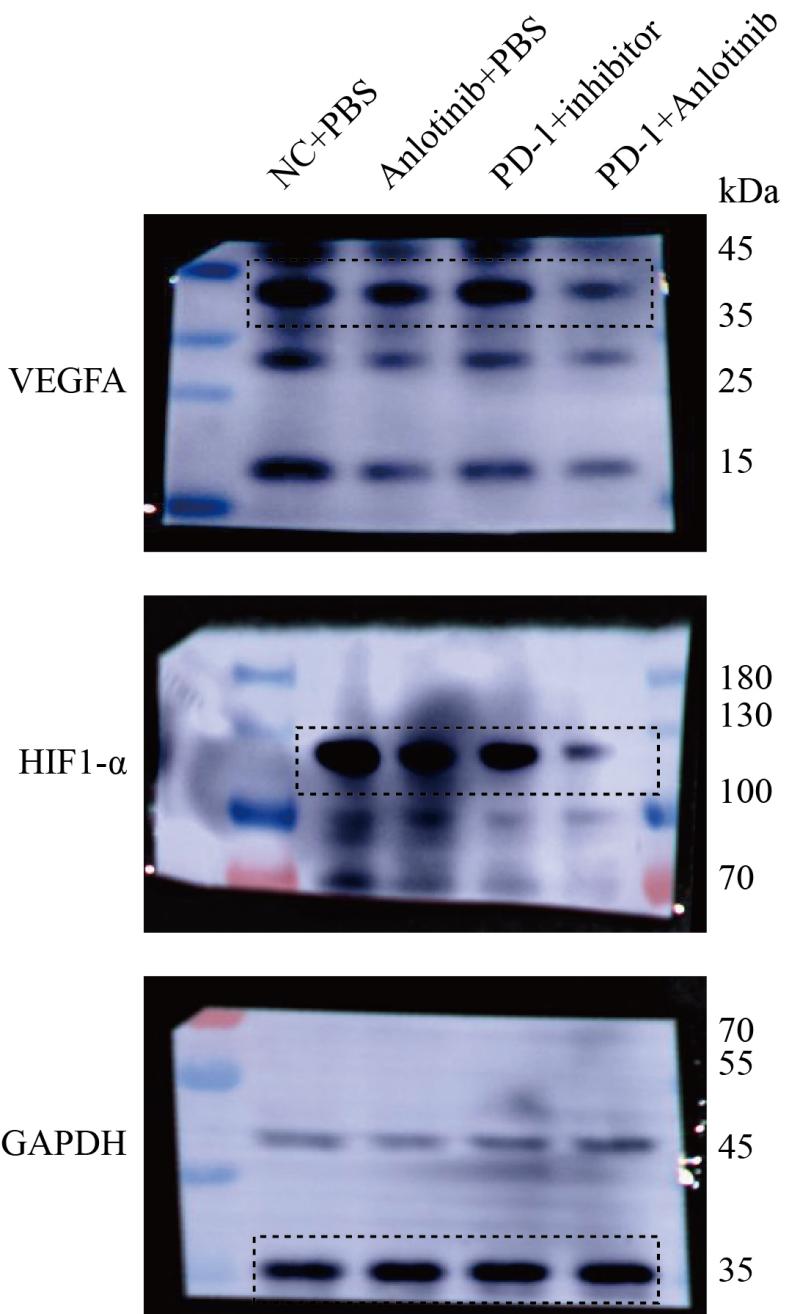


Fig. S2. The uncropped images of original western blots in Fig. 2.

**Supplementary Western blot images**

**bcl2**


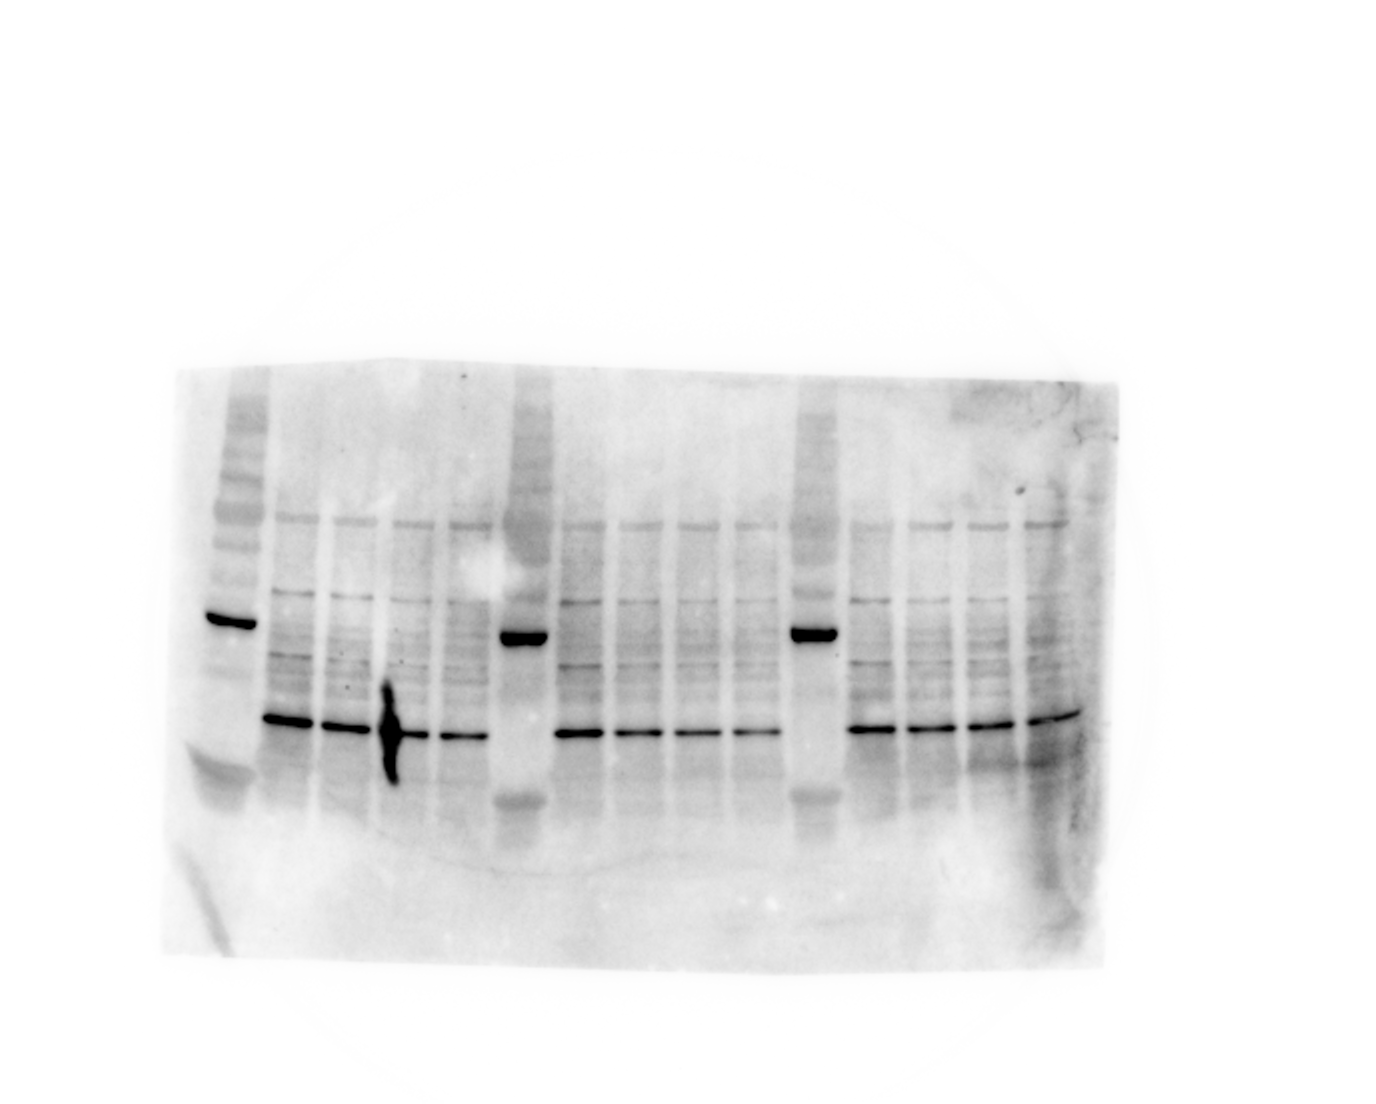


Fig. S3. The uncropped images of original western blots for the bcl2 protein

**caspase3**


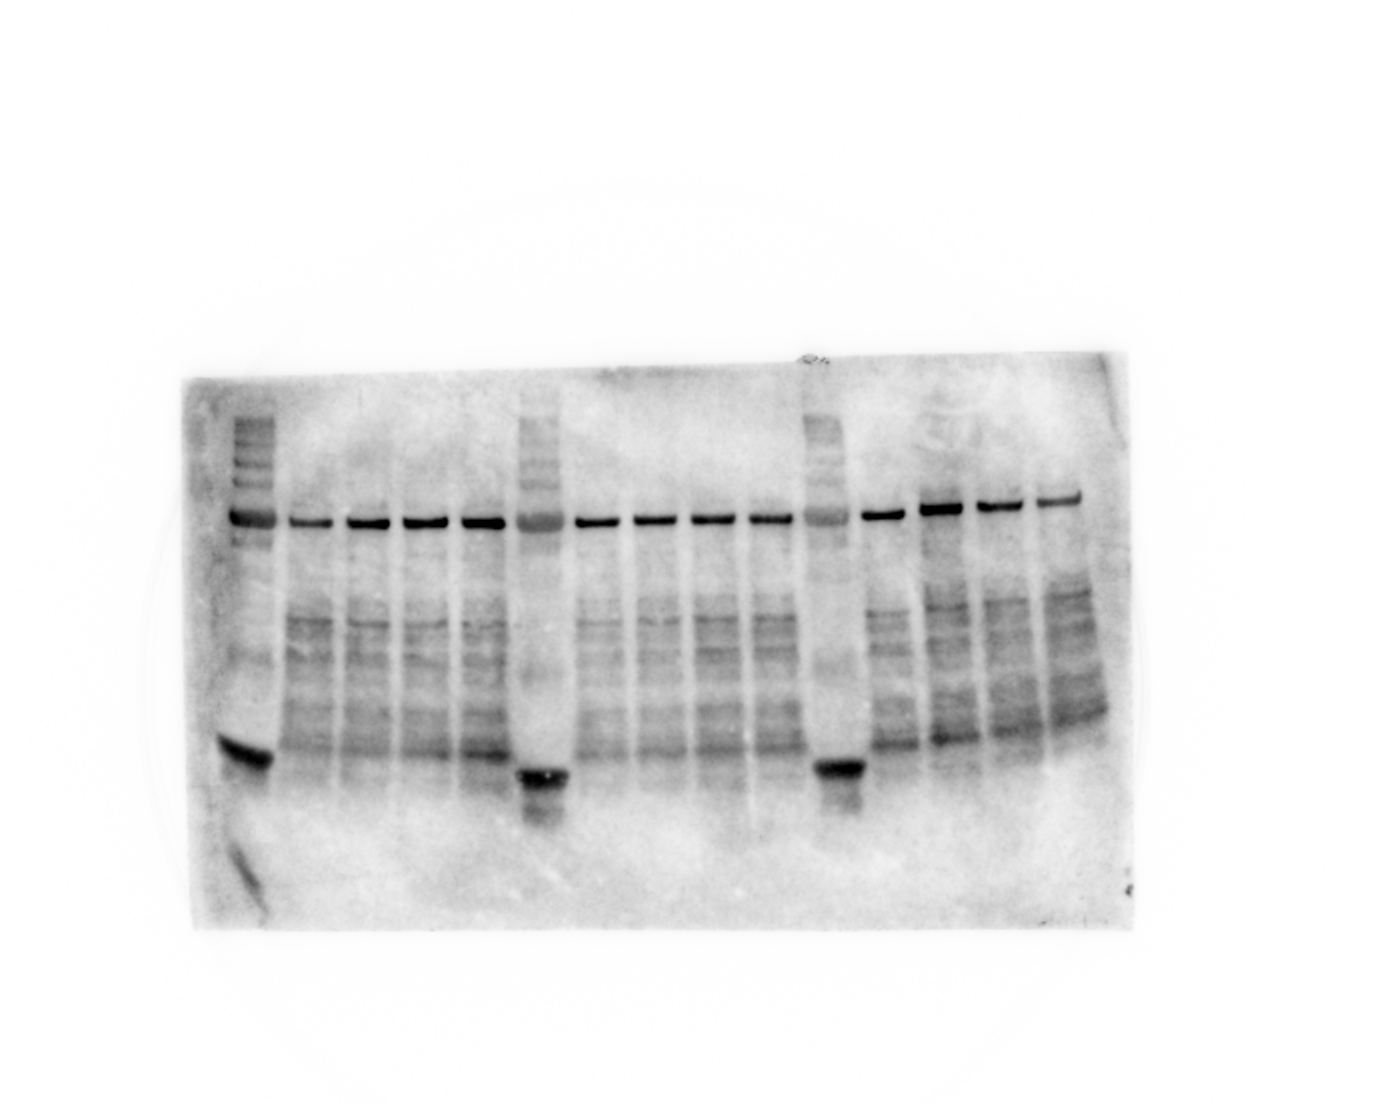


Fig. S4. The uncropped images of original western blots for thecaspase3 protein

**cleaved caspase3**


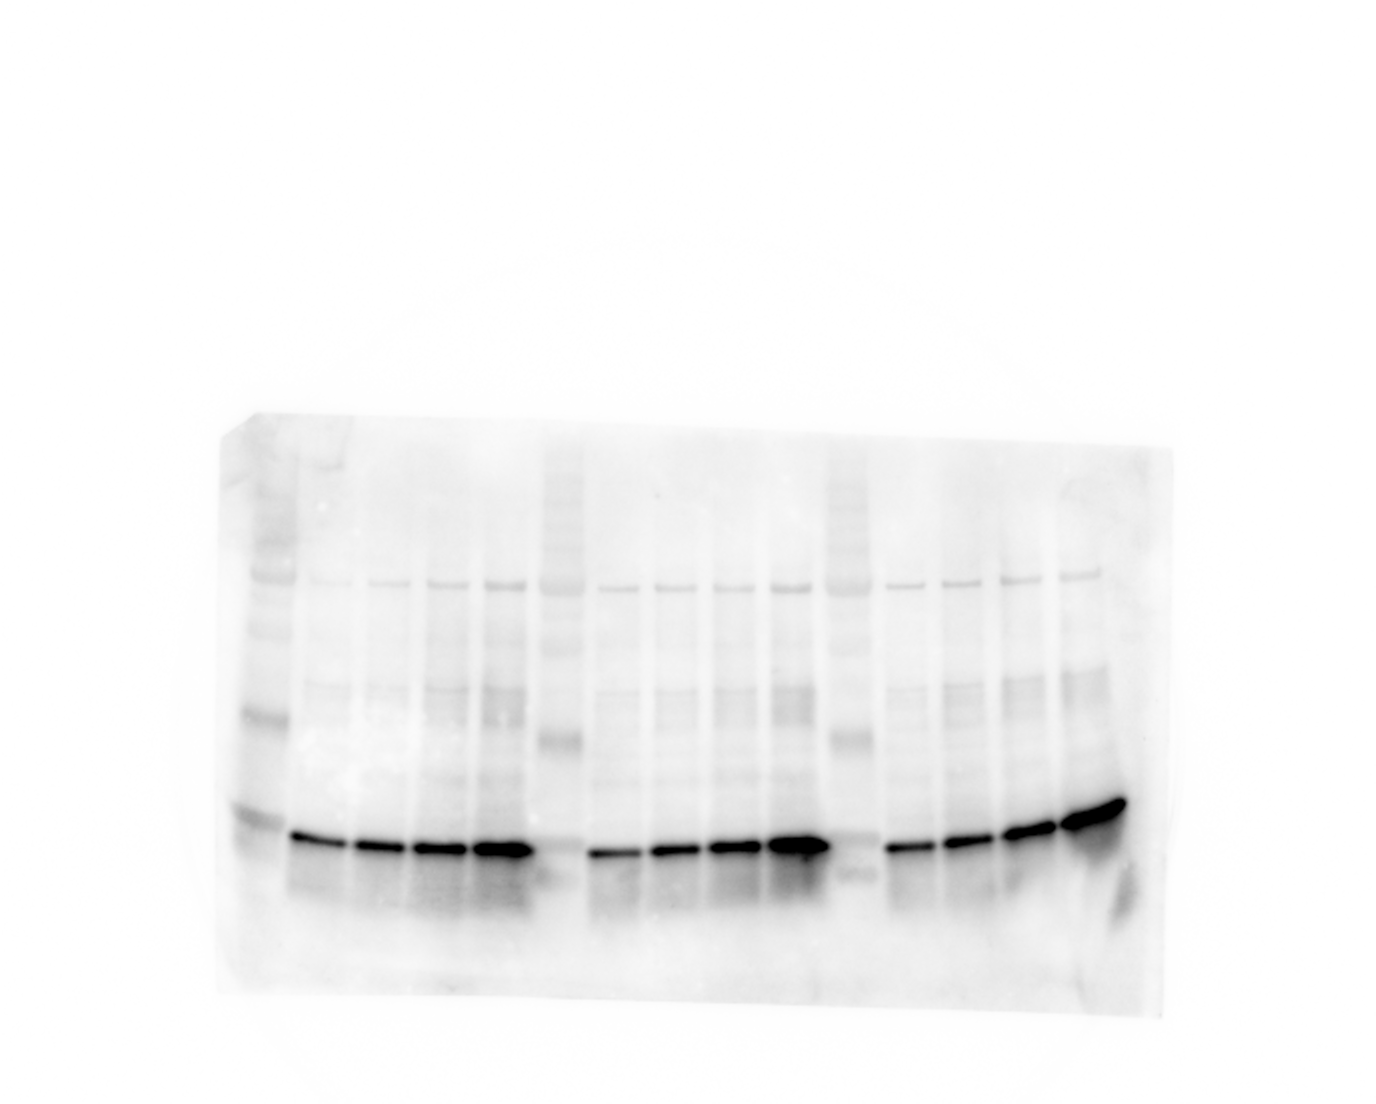


Fig. S5. The uncropped images of original western blots for thecleaved caspase3 protein

**HIF1-α**


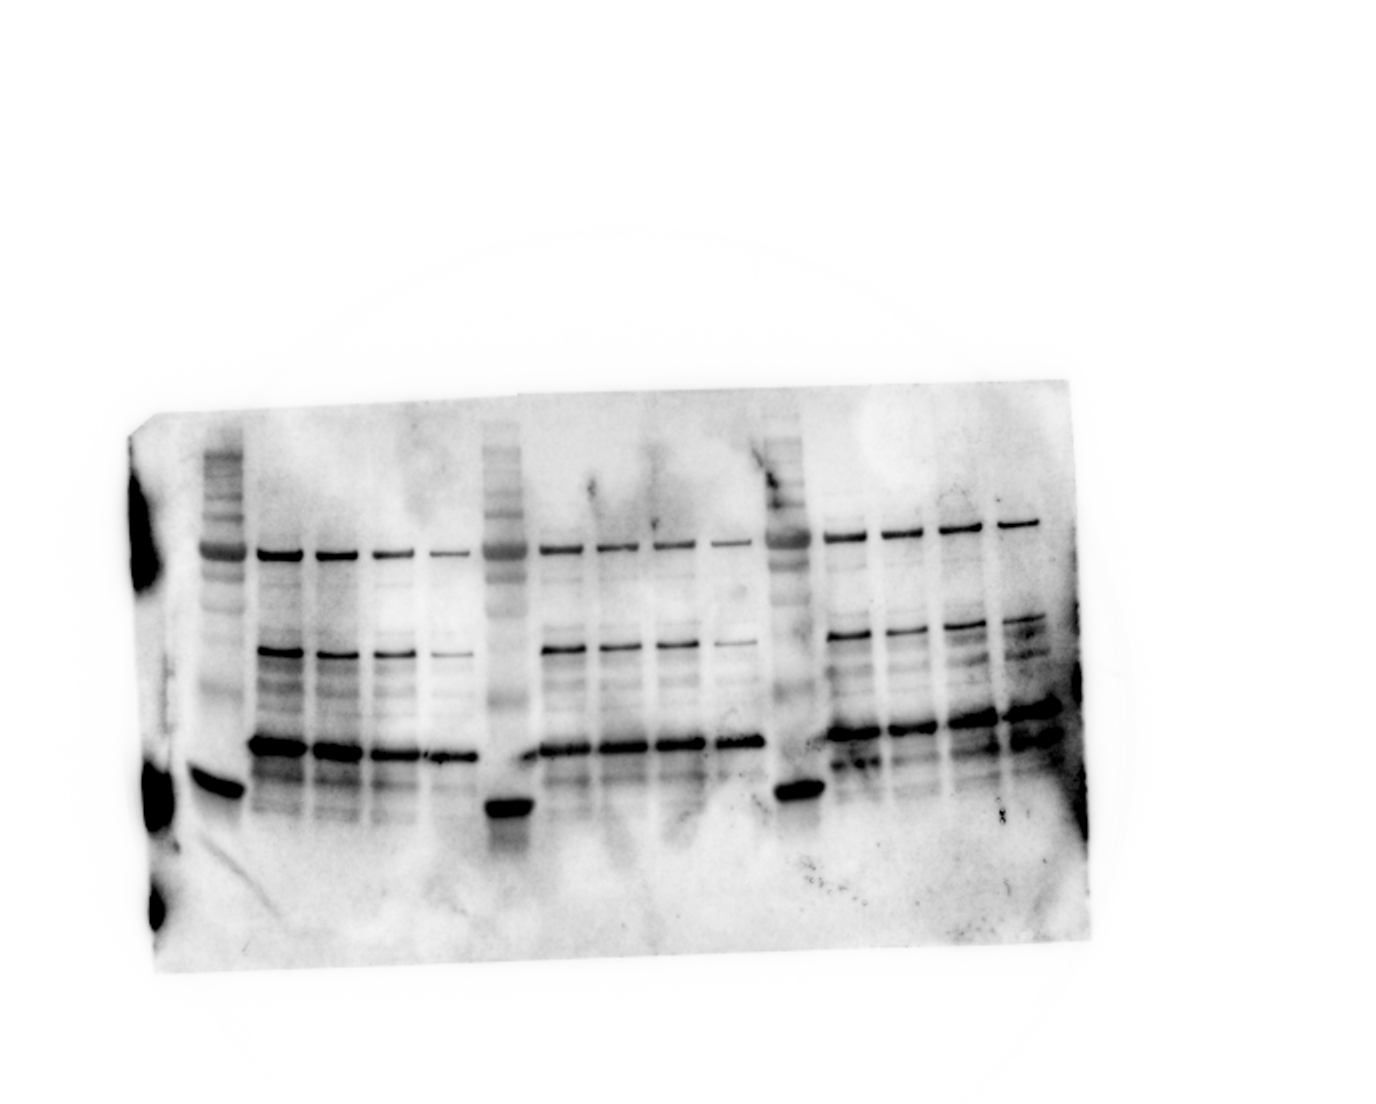


Fig. S6. The uncropped images of original western blots for theHIF1-α protein

**VEGFA**

**
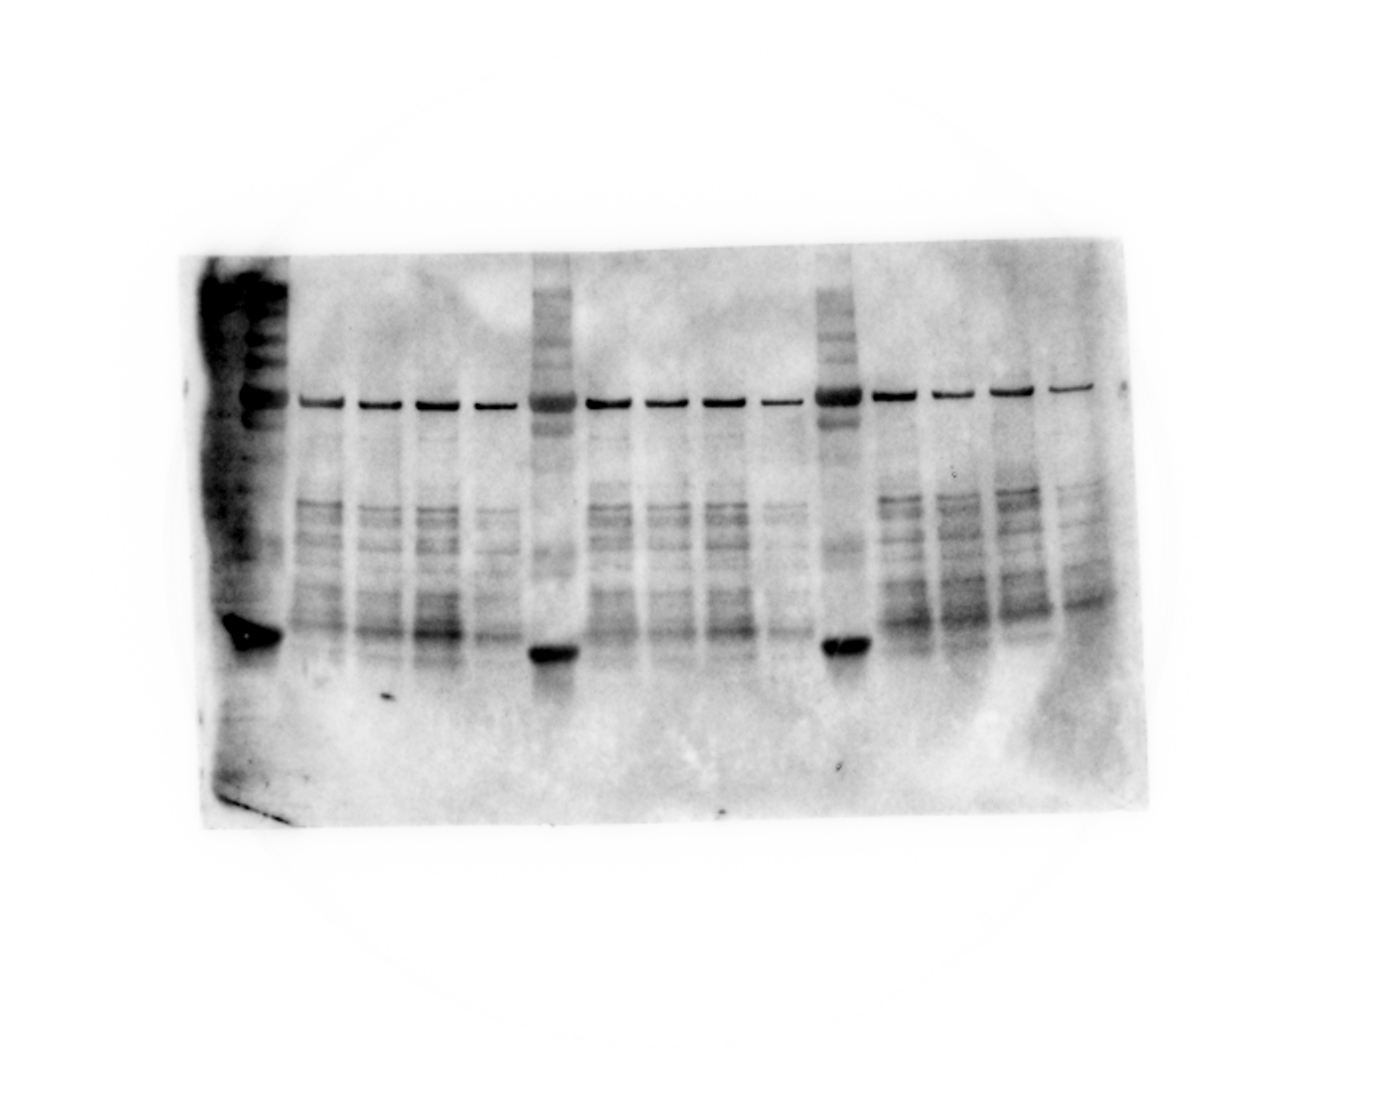
**

Fig. S7. The uncropped images of original western blots for theVEGFA protein

Table S1 A

Western Blot Antibodies

| Western Blot Antibodies | | | |
| --- | --- | --- | --- |
| Antibody Name | Antibody Concentration Prepared | Catalog Number | Company |
| HIF1-α | 1:1,000 | BF8002 | Affinity Biosciences |
| Caspase-3 | 1:1,000 | HY-P80046 | MedChemExpress |
| Cleaved-Caspase 3 | 1:1,000 | HY-P80623 | MedChemExpress |
| VEGFA | 1:1,000 | AF5131 | Affinity Biosciences |
| BCL-2 | 1:1,000 | AF6139 | Affinity Biosciences |
| BAX | 1:1,000 | AF0120 | Affinity Biosciences |
| GAPDH | 1:1,0000 | AF7021 | Affinity Biosciences |

Table S1 B

Flow cytometry Antibodies

| Antibody Name | Catalog Number | Company |
| --- | --- | --- |
| FITC anti-mouse CD45 | 103108 | BioLegend |
| Brilliant Violet 421™ anti-mouse CD4 | 100443 | BioLegend |
| APC anti-mouse CD25 | 102012 | BioLegend |
| FOXP3 Monoclonal Antibody (FJK-16s), PE | 12-5773-82 | ebioscience |
| PerCP/Cyanine5.5 anti-mouse/human CD11b | 101228 | BioLegend |
| APC/Fire™ 750 anti-mouse Ly-6C | 128046 | BioLegend |
| CD163 Monoclonal Antibody (TNKUPJ), PE | 12-1631-82 | ebioscience |
| APC anti-mouse F4/80 | 123116 | BioLegend |
| Brilliant Violet 421™ anti-mouse Ly-6G | 127627 | BioLegend |
| PE anti-mouse CD279 (PD-1) | 135206 | BioLegend |
| APC anti-mouse CD8a | 100712 | BioLegend |

Section 2.2 revised and Supplementary Table S2 euthanasia/death time and endpoint.

| Mouse ID | Group | Endpoint day | Endpoint criterion |
| --- | --- | --- | --- |
| NC-1 | Control | Day 16 | tumor necrosis |
| NC-2 | Control | Day 19 | tumor ulceration |
| NC-3 | Control | Day 23 | Severe distress |
| NC-4 | Control | Day 25 | Tumor volume ≥2000 mm³ |
| NC-5 | Control | Day 28 | Tumor volume ≥2000 mm³ |
| NC-6 | Control | Day 30 | Tumor volume ≥2000 mm³ |
| Anl-1 | anlotinib-only treatment group | Day 8 | markedly reduced mobility |
| Anl-2 | anlotinib-only treatment group | Day 28 | tumor necrosis |
| Anl-3 | anlotinib-only treatment group | Day 33 | persistent hunching |
| Anl-4 | anlotinib-only treatment group | Day 35 | tumor ulceration |
| Anl-5 | anlotinib-only treatment group | Day 38 | Tumor volume ≥2000 mm³ |
| Anl-6 | anlotinib-only treatment group | Day 39 | Tumor volume ≥2000 mm³ |
| PD-1 1 | PD-1/PD-L1-IN-9 hydrochloride-only treatment group | Day 32 | tumor ulceration |
| PD-1 2 | PD-1/PD-L1-IN-9 hydrochloride-only treatment group | Day 36 | persistent hunching |
| PD-1 3 | PD-1/PD-L1-IN-9 hydrochloride-only treatment group | Day 43 | inability to access food |
| PD-1 4 | PD-1/PD-L1-IN-9 hydrochloride-only treatment group | Day 53 | tumor necrosis |
| PD-1 5 | PD-1/PD-L1-IN-9 hydrochloride-only treatment group | Day 58 | Severe distress |
| PD-1 6 | PD-1/PD-L1-IN-9 hydrochloride-only treatment group | Day 74 | Tumor volume ≥2000 mm³ |
| Anl+PD-1 1 | combination of anlotinib and PD-1/PD-L1-IN-9 hydrochloride treatment group | Day 44 | inability to access water |
| Anl+PD-1 2 | combination of anlotinib and PD-1/PD-L1-IN-9 hydrochloride treatment group | Day 60 | tumor ulceration |
| Anl+PD-1 3 | combination of anlotinib and PD-1/PD-L1-IN-9 hydrochloride treatment group | Day 84 | Severe distress |
| Anl+PD-1 4 | combination of anlotinib and PD-1/PD-L1-IN-9 hydrochloride treatment group | Day 95 | Tumor volume ≥2000 mm³ |
| Anl+PD-1 5 | combination of anlotinib and PD-1/PD-L1-IN-9 hydrochloride treatment group | Day 100 | euthanasia |
| Anl+PD-1 6 | combination of anlotinib and PD-1/PD-L1-IN-9 hydrochloride treatment group | Day 100 | euthanasia |
